# Supplementary material
Source: PubMed Central journal article supplement (PMC4791818)
Supplement: CJN.07110615_CJN07110615SupplementaryData.pdf [file CJN.07110615_CJN07110615SupplementaryData.pdf]

1 **SUPPLEMENTAL TABLE**

2 **Table 1.** Factors associated with treatment including calcineurin inhibitors (vs.

3 glucocorticoids alone)

| Variables                                | Univariate  |           | Multivariate |           |
|------------------------------------------|-------------|-----------|--------------|-----------|
|                                          | OR          | 95% CI    | OR           | 95% CI    |
| Age at biopsy (per 10 year higher)       | <b>0.74</b> | 0.66-0.90 | 0.82         | 0.74-1.00 |
| Male sex                                 | 0.67        | 0.40-1.12 | 1.05         | 0.55-2.04 |
| Black race                               | <b>1.77</b> | 1.06-2.97 | 1.14         | 0.59-2.19 |
| Variant                                  |             |           |              |           |
| NOS                                      | 1.00        |           | 1            |           |
| Tip                                      | <b>0.18</b> | 0.07-0.47 | <b>0.17</b>  | 0.05-0.53 |
| Collapsing                               | 1.85        | 0.92-3.70 | 1.73         | 0.74-4.02 |
| Baseline eGFR <30 mL/min                 | 0.86        | 0.40-1.84 | 1.28         | 0.51-3.24 |
| Baseline proteinuria ≥3.5 g/d            | 0.69        | 0.35-1.36 | 0.58         | 0.25-1.36 |
| Serum albumin at biopsy (per g/dL lower) | <b>1.39</b> | 1.03-1.85 | 1.43         | 0.95-2.17 |
| Edema at baseline                        | 1.08        | 0.61-1.94 | 1.25         | 0.59-2.65 |
| Hypertension at baseline                 | <b>0.53</b> | 0.30-0.94 | 0.66         | 0.34-1.28 |

4 OR, odds ratio; CI, confidence interval; FSGS, focal segmental glomerulosclerosis; NOS,

5 not otherwise specified; eGFR, estimated glomerular filtration rate.

6

7
